# Supplementary material for: Expanded targeting scope of LbCas12a variants allows editing of multiple oncogenic mutations
Source: PubMed Central journal article supplement — Mol Ther Nucleic Acids. 2022 Sep 19;30:131–42. doi: 10.1016/j.omtn.2022.09.005 (PMC9535386; doi:10.1016/j.omtn.2022.09.005), 2022-09-19
Supplement: mmc1.pdf [file mmc1.pdf]

OMTN, Volume 30

## **Supplemental information**

**Expanded targeting scope of LbCas12a variants  
allows editing of multiple oncogenic mutations**

**Eunyoung Choi, Hye-Yeon Hwang, Eunji Kwon, Daesik Kim, and Taeyoung Koo**

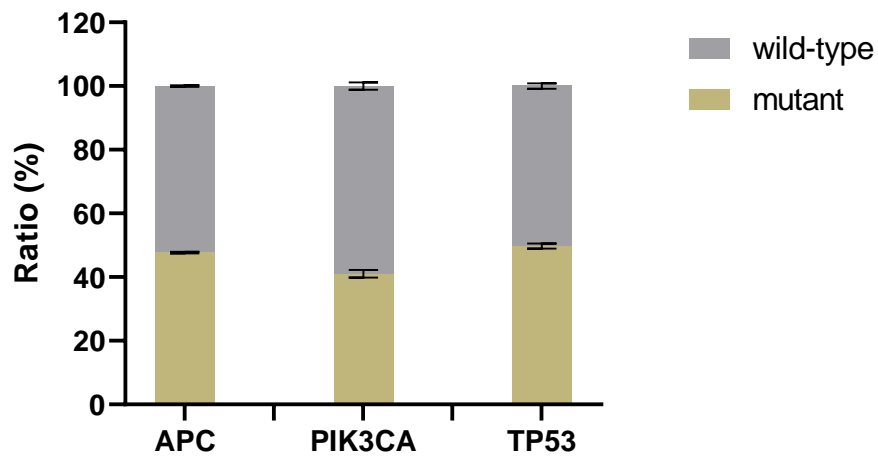

**Figure S1.** Ratios of wild-type vs mutant *APC*, *PIK3CA*, and *TP53* sequences in HCT-15 colon cancer cells. Genomic DNA was isolated from HCT-15 cells and analyzed using deep sequencing.

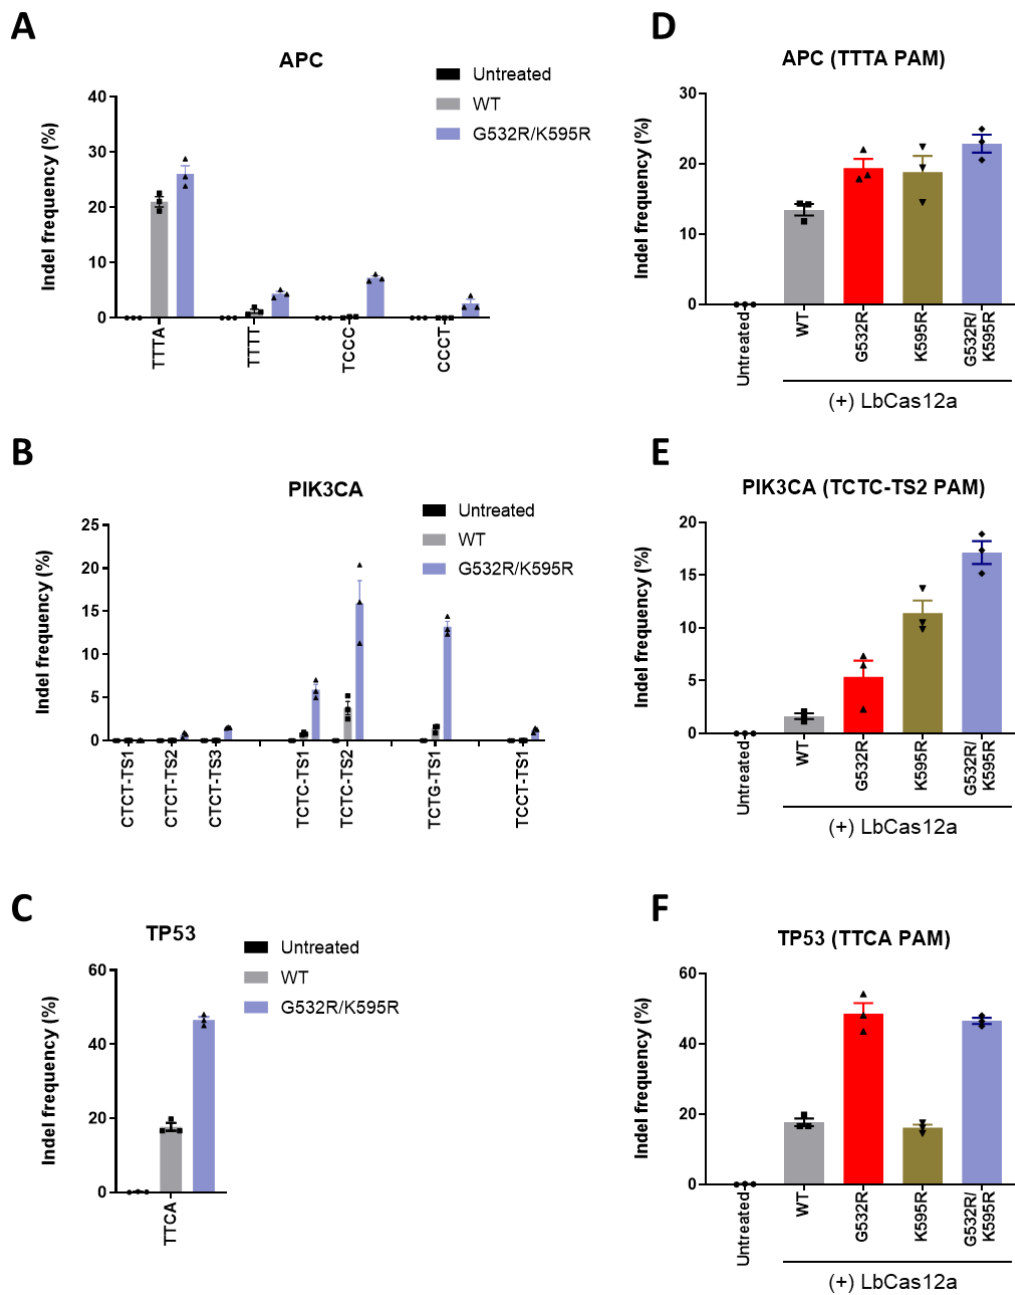

**Figure S2.** Indel frequencies mediated by engineered LbCas12a-mediated at oncogenic sites. (A-C) Efficiencies of LbCas12a and the LbCas12a-G532/K595R at endogenous target sites in the *APC* (A), *PIK3CA* (B), and *TP53* (C) genes in HCT-15 colon cancer cells. Mean indel frequencies  $\pm$  s.e.m. are shown. Dots represent individual data points. (D-F) Comparison of editing efficiencies of LbCas12a variants in HCT-15 cells transfected with crRNAs that resulted in the highest indel frequencies in the *APC* (D), *PIK3CA* (E), or *TP53* (F) genes.

**Table S1.** Potential off-target sites of LbCas12a identified by Digenome-seq.<sup>30</sup> Mismatched nucleotides are shown in red. On, on- target sites; Off, off-target site.

| PAM variant | Number of cleavage sites |
|-------------|--------------------------|
| TTN         | 37                       |
| TTCN        | 2                        |
| TCTN        | 1                        |
| CTTN        | 1                        |

| Target | PAM | Location | Target sequence (5' to 3') |
|--------|-----|----------|----------------------------|
| On     | TTG | chr2     | TCCTCCGGTTCTGGAACCACACC    |
| Off    | TTC | chr2     | TCCTCCGGTTCTGGAACCgAtC     |
| Off    | TTC | chr17    | TCCTCCGGTTCTGGAACCgAtt     |
| On     | TTC | chr19    | CTGATGGTCCATGTCTGTACTC     |
| Off    | TTC | chr5     | CTGATGGTCCATacCTGTTAacg    |
| On     | TTT | chr19    | GTGGGCAACATGCTGGTCATCCT    |
| Off    | CTG | chr5     | GTGGGCAACtcGcTGTCATgtT     |

**Table S2.** The crRNA target sequences for the experiments shown in Figures 1 and 2. Target sequences are shown in black and PAM sequences in blue.

| PAM  | Gene   | No. | Sequence (5' to 3')          |
|------|--------|-----|------------------------------|
| TCTN | TP53   | 1   | TCTACAAGCAGTCACAGCACATGACGG  |
|      |        | 2   | TCTTGGCCAGTTGGCAAAACATCTTGT  |
|      |        | 3   | TCTGAGCAGCGCTCATGGTGGGGCAG   |
|      |        | 4   | TCTCCTAGGTTGGCTCTGACTGTACCA  |
|      | APC    | 5   | TCTATCCCCTGATTCAGAAAATTTGA   |
|      |        | 6   | TCTTAACAGAGGTCATCTCAGAACAAAG |
|      |        | 7   | TCTGCCGCTCAGCATCATGTGAGCCGG  |
|      |        | 8   | TCTCAGAACAAGCATGAAACCGGCTCA  |
|      | PIK3CA | 9   | TCTACTATGAGGTGAATTGAGGTCCCT  |
|      |        | 10  | TCTTGGGGGCATCAAGTGGATGCCCA   |
|      |        | 11  | TCTGAACGTTTGTAAAGAAGCTGTGGA  |
|      |        | 12  | TCTCCAAATAATGACAAGCAGAAGTAT  |
| TTCN | TP53   | 13  | TTCATGCCGCCCATGCAGGAAGTCTTA  |
|      |        | 14  | TTCTGTTCATCCAAATACTCCACACGCA |
|      |        | 15  | TTCCACATAGTGTGGTGGTCCCTATG   |
|      |        | 16  | TTCCACACCCCGCCCGGCACCCGCGT   |
|      | APC    | 17  | TTCATTCTGCCGCTCAGCATCATGTGA  |
|      |        | 18  | TTCTGCCGCTCAGCATCATGTGAGCCG  |
|      |        | 19  | TTCCGACATATCATCCTTATCATGAG   |
|      |        | 20  | TTCCCGGGCAGTAAAGAGGCTCGGGC   |
|      | PIK3CA | 21  | TTCACTTGAAGAAGTTGATGGAGGGG   |
|      |        | 22  | TTCTTAAATAGTTTCATGCTTTATGGT  |
|      |        | 23  | TTCTGTAAGTGTACTCAAGAAGCAGAA  |
|      |        | 24  | TTCCGAAGAAATATTCTGAACGTTTGT  |
| TCCN | TP53   | 25  | TCCACACCCCGCCCGGCACCCGCGTC   |
|      |        | 26  | TCCTCAGCATCTTATCCGAGTGAAGG   |
|      |        | 27  | TCCGTCATGTGCTGTGACTGCTTGTAG  |
|      |        | 28  | TCCCCTGCCCTCAACAAGATGTTTGC   |
|      | APC    | 29  | TCCATCTTAACAGAGGTCATCTCAGAA  |
|      |        | 30  | TCCTTGACCTTCAATTCTGCCGCTCAGC |
|      |        | 31  | TCCGCAATGCCAAAAAGAAAAAGCCT   |
|      |        | 32  | TCCCAACAATACAGAGTCTTGTGCATT  |
|      | PIK3CA | 33  | TCCAACAACCTCTTCAAGATGAATCTT  |
|      |        | 34  | TCCTGATTGCTTCAGCAATTAAGTGT   |
|      |        | 35  | TCCGAAGAAATATTCTGAACGTTTGT   |
|      |        | 36  | TCCCCTTGGGTTATAAATAGTGCCTC   |
| CTCN | TP53   | 37  | CTCATGGTGGGGGCAGCGCCTCACAAC  |
|      |        | 38  | CTCTTAGGTCTGGCCCTCCTCAGCAT   |
|      |        | 39  | CTCGATAAGATGCTGAGGAGGGGCCA   |
|      |        | 40  | CTCCGTCATGTGCTGTGACTGCTTGTA  |
|      | APC    | 41  | CTCACATGATGCTGAGCGGCAGAAATGA |
|      |        | 42  | CTCTGTATTGTTGGGAAATCCCGGGG   |
|      |        | 43  | CTCGGATTCACGCCTGCCTCTCTTGT   |
|      |        | 44  | CTCCACTCCTTGACCTTCATTCTGCC   |
|      | PIK3CA | 45  | CTCAAGAAGCAGAAAGGGAAGAATTTT  |
|      |        | 46  | CTCTGAACAACATAAACTCTGTGTTTT  |
|      |        | 47  | CTCGAAGTATGTTGCTATCCTCTGAAC  |
|      |        | 48  | CTCCATCAACTTCTTCAAGATGAATCT  |
| TTTN | TP53   | 49  | TTTAAATGGGACAGGTAGGACCTGATT  |
|      |        | 50  | TTTTGCCAACTGGCCAAGACCTGCCCT  |
|      |        | 51  | TTTGCCAACCTGGCCAAGACCTGCCCTG |
|      |        | 52  | TTTCCTTCCACTCGGATAAGATGCTGA  |
|      | APC    | 53  | TTTACTGCCCGGGAATTTCCCAACAA   |
|      |        | 54  | TTTTTTGGCATTGGCGGAGCTTATACAT |
|      |        | 55  | TTTGGCATGCGGAGCTTATACATTC    |
|      |        | 56  | TTTCTCCCACTCCTTGACCTTCATTCT  |
|      | PIK3CA | 57  | TTTACAAACGTTCAGAATATTTCTTCG  |
|      |        | 58  | TTTGTAGTTGTTTCAAGGATAGCAACAT |
|      |        | 59  | TTTGATGAAACAAGACGACTTTGTGAC  |
|      |        | 60  | TTTCGTCTTCTTGGTAAACACTTACGA  |

**Table S3.** Summary of indel frequencies generated by the engineered LbCas12a variants at sites with non-canonical and canonical PAMs.

|      | (+) Cas12a |      |       |       |                 |
|------|------------|------|-------|-------|-----------------|
|      | Untreated  | WT   | G532R | K595R | G532R/<br>K595R |
| TCTN | 0.0        | 2.7  | 5.5   | 9.6   | 12.4            |
| TTCN | 0.0        | 10.1 | 23.5  | 11.3  | 23.2            |
| TCCN | 0.0        | 2.1  | 13.9  | 6.3   | 16.9            |
| CTCN | 0.0        | 0.4  | 6.9   | 0.8   | 6.6             |
| TTTN | 0.0        | 29.9 | 28.0  | 32.8  | 28.9            |

Indel frequency (%)

**Table S4.** The crRNA target sequences for the experiments shown in Figure 3. Target sequences are shown in black and PAM sequences in blue.

| <b>PAM</b> | <b>Gene</b>   | <b>No.</b> | <b>Sequence (5' to 3')</b>    |
|------------|---------------|------------|-------------------------------|
| TCCT       | <i>TP53</i>   | 1          | TCCTCAGCATCTTATCCGAGTGGGAAGG  |
|            | <i>APC</i>    | 2          | TCCTTGACCTTCATTTCTGCCGCTCAGC  |
|            | <i>CTNNB1</i> | 3          | TCCTTCGGGCTGGTGACAGGGAAGACA   |
|            | <i>SRSF3</i>  | 4          | TCCTGTCCATTGGACTGTAAGGTTTAT   |
| TTCT       | <i>TP53</i>   | 5          | TTCTGTCATCCAAATACTCCACACGCA   |
|            | <i>APC</i>    | 6          | TTCTGCCGCTCAGCATCATGTGAGCCG   |
|            | <i>CTNNB1</i> | 7          | TTCTGCATCATCTTGATAGTTAATCAA   |
| TCTT       | <i>SRSF3</i>  | 8          | TTCTAGAGATAGGAGAAGAGAGAGATC   |
|            | <i>TP53</i>   | 9          | TCTTGGCCAGTTGGCAAAACATCTTGT   |
|            | <i>APC</i>    | 10         | TCTTAAACAGAGGTCATCTCAGAACAAG  |
| CTCT       | <i>CTNNB1</i> | 11         | TCTTACCTGGACTCTGGAATCCATTCT   |
|            | <i>SRSF3</i>  | 12         | TCTTGGAAACAATGGCAACAAGACGGA   |
|            | <i>TP53</i>   | 13         | CTCTTAGGTCTGGCCCTCCTCAGCAT    |
| CCTT       | <i>APC</i>    | 14         | CTCTGTATGTTGGGAAATCCCAGGGG    |
|            | <i>CTNNB1</i> | 15         | CTCTGTTCAGCTTCTGGGTTGATG      |
|            | <i>SRSF3</i>  | 16         | CTCTTACACGGCAGCCACATAGTGTT    |
| CCTT       | <i>TP53</i>   | 17         | CCTTCCACTCGGATAAGATGCTGAGGA   |
|            | <i>APC</i>    | 18         | CCTTCATTCTGCCGCTCAGCATCATGT   |
|            | <i>CTNNB1</i> | 19         | CCTTAGTCCAAAGGCTCAGGCCAGAAA   |
| CTTT       | <i>SRSF3</i>  | 20         | CCTTACAGTCCAATGGACAGGAATCAC   |
|            | <i>TP53</i>   | 21         | CTTTTCGACATAGTGTGGTGGTGCCT    |
|            | <i>APC</i>    | 22         | CTTTACTGCCCCGGGAATTTCCAACA    |
| CCCT       | <i>CTNNB1</i> | 23         | CTTTACCACTCAGAGAAGGAGCTGTGG   |
|            | <i>SRSF3</i>  | 24         | CTTTGGCTACTATGGACCACTCCGAA    |
|            | <i>TP53</i>   | 25         | CCCTGTGCAGCTGTGGGTTGATTCCAC   |
| TTTT       | <i>APC</i>    | 26         | CCCTGGCCCGAGCCTCTTTACTGCCCC   |
|            | <i>CTNNB1</i> | 27         | CCCTTAGTCCAAAGGCTCAGGCCAGAA   |
|            | <i>SRSF3</i>  | 28         | CCCTCAGAACACTATGTGGCTGCCGTG   |
| TTTT       | <i>TP53</i>   | 29         | TTTTGCCAACTGGCCAAGACCTGCCCT   |
|            | <i>APC</i>    | 30         | TTTTTGGCATTGCGGAGCTTATACAT    |
|            | <i>PIK3CA</i> | 31         | TTTTAGTTGTTTCCAGAGGATAGCAACAT |
| TTTT       | <i>CTNNB1</i> | 32         | TTTTCCCTTCCGGAGCAGGGTTCTGCC   |
|            | <i>SRSF3</i>  | 33         | TTTTGGCTACTATGGACCACTCCGAAG   |

**Table S5.** The crRNA target sequences for the experiments shown in Figure 4. Target sequences are shown in black and PAM sequences in blue. Adenines (As) shown in red in the sequences represent targetable nucleotides in the LbABE8e target window (positions 6 to 16 in the protospacer, counting from the PAM-proximal base).

| PAM  | Gene          | No. | Sequence (5' to 3')                                    |
|------|---------------|-----|--------------------------------------------------------|
| TCTN | <i>TP53</i>   | 1   | TCTACAAGCAGTCA <b>CAGCA</b> CATGACGG                   |
|      | <i>PIK3CA</i> | 2   | TCTACTATGAGGTGAATTGAGGTCCCT                            |
|      | <i>APC</i>    | 3   | TCTTAACAGAGGTCA <b>TCTCAGA</b> ACAAG                   |
|      | <i>SRSF3</i>  | 4   | TCTTGAAACA <b>ATGGCAACA</b> AAGACGGA                   |
| TTCN | <i>TP53</i>   | 5   | TT <b>CATG</b> CCGCC <b>CA</b> TGCAGGA <b>ACT</b> GTTA |
|      | <i>APC</i>    | 6   | TT <b>CAT</b> TCTGCCGCT <b>CAGCA</b> TCATGTGA          |
|      | <i>SRSF3</i>  | 7   | TTCTAGAGATAGG <b>AGAAGA</b> GAGAGATC                   |
|      | <i>TP53</i>   | 8   | TTCTGTCATCC <b>AAATA</b> CTCCACACGCA                   |
| TTCN | <i>CTNNB1</i> | 9   | TTCTGCATCA <b>TCTTGA</b> TAGTTAATCAA                   |
|      | <i>APC</i>    | 10  | TT <b>CGG</b> GACAT <b>ATCA</b> TCCT <b>TAT</b> CATGAG |
|      | <i>PIK3CA</i> | 11  | TT <b>CGT</b> AAAGT <b>TTACTCA</b> AGAAGCAGAA          |
|      | <i>TP53</i>   | 12  | TTCCACACCCCGCCCGGC <b>ACCC</b> GGGT                    |
| TCCN | <i>APC</i>    | 13  | TTCCCGGGGC <b>AGTAAAG</b> AGGCTCGGGC                   |
|      | <i>TP53</i>   | 14  | TCCACACCCCGCCCGGC <b>ACCC</b> GGTC                     |
|      | <i>APC</i>    | 15  | TCC <b>ATCTTAA</b> CAGAGGT <b>CA</b> TCTCAGAA          |
|      | <i>SRSF3</i>  | 16  | TCCTGTCCATGG <b>ACTGTAA</b> GGTTTAT                    |
| TCCN | <i>CTNNB1</i> | 17  | TCCTTCGGGCTGGT <b>GACAGGGA</b> AGACA                   |
|      | <i>TP53</i>   | 18  | TCCGTCATGTGCTGT <b>ACTGCT</b> TGTAG                    |
|      | <i>APC</i>    | 19  | TCCGCAATGCC <b>AAAAAGAA</b> AAAGCCT                    |
|      | <i>APC</i>    | 20  | TCCCAACA <b>ATACAG</b> AGTCTTTGT <b>CATT</b>           |
| CTCN | <i>SRSF3</i>  | 21  | CTCTTACACGGC <b>AGCCACA</b> TAGTG <b>TTC</b>           |
|      | <i>TP53</i>   | 22  | CTCCGTCATGTGCTGT <b>ACTGCT</b> TGTA                    |



**Table S6.** Base editing window of LbABE8e variants at six target sites with non-canonical PAMs.

| PAM (Site #)   | LbABE8e |      |      |      |      |      |      |      |      |      |      |
|----------------|---------|------|------|------|------|------|------|------|------|------|------|
|                | A6      | A7   | A8   | A9   | A10  | A11  | A12  | A13  | A14  | A15  | A16  |
| TTCA (Site 5)  |         |      |      | 3.31 |      |      |      | 2.16 |      |      | 0.07 |
| TTCT (Site 8)  |         |      | 3.33 | 1.17 | 0.93 |      | 5.07 |      |      |      |      |
| TTCG (Site 11) |         |      |      | 2.67 |      |      |      | 0.27 | 0.00 |      | 0.03 |
| TTCC (Site 13) |         | 0.41 |      |      | 3.62 | 0.54 | 0.35 |      | 0.05 |      |      |
| TCCA (Site 15) | 0.02    |      | 1.81 |      | 0.88 |      |      |      |      | 0.11 |      |
| TCCT (Site 16) |         |      |      |      | 1.48 |      |      |      |      | 1.32 | 0.06 |

| PAM (Site #)   | LbABE8e-G532R |      |      |      |       |      |      |      |      |      |      |
|----------------|---------------|------|------|------|-------|------|------|------|------|------|------|
|                | A6            | A7   | A8   | A9   | A10   | A11  | A12  | A13  | A14  | A15  | A16  |
| TTCA (Site 5)  |               |      |      | 4.05 |       |      |      | 2.23 |      |      | 0.10 |
| TTCT (Site 8)  |               |      | 5.67 | 1.47 | 1.40  |      | 7.43 |      |      |      |      |
| TTCG (Site 11) |               |      |      | 5.50 |       |      |      | 0.80 | 0.03 |      | 0.03 |
| TTCC (Site 13) |               | 1.40 |      |      | 14.59 | 2.22 | 1.13 |      | 0.11 |      |      |
| TCCA (Site 15) | 0.01          |      | 4.23 |      | 2.45  |      |      |      |      | 0.42 |      |
| TCCT (Site 16) |               |      |      |      | 4.97  |      |      |      |      | 4.40 | 0.26 |

| PAM (Site #)   | LbABE8e-K595R |      |      |      |      |      |      |      |      |      |      |
|----------------|---------------|------|------|------|------|------|------|------|------|------|------|
|                | A6            | A7   | A8   | A9   | A10  | A11  | A12  | A13  | A14  | A15  | A16  |
| TTCA (Site 5)  |               |      |      | 2.49 |      |      |      | 1.78 |      |      | 0.02 |
| TTCT (Site 8)  |               |      | 1.97 | 0.63 | 0.53 |      | 3.03 |      |      |      |      |
| TTCG (Site 11) |               |      |      | 2.73 |      |      |      | 0.33 | 0.00 |      | 0.07 |
| TTCC (Site 13) |               | 0.48 |      |      | 6.17 | 0.90 | 0.64 |      | 0.08 |      |      |
| TCCA (Site 15) | 0.00          |      | 1.89 |      | 0.79 |      |      |      |      | 0.14 |      |
| TCCT (Site 16) |               |      |      |      | 4.97 |      |      |      |      | 4.40 | 0.26 |

| PAM (Site #)   | LbABE8e-G532R/K595R |      |      |      |       |      |       |      |      |      |      |
|----------------|---------------------|------|------|------|-------|------|-------|------|------|------|------|
|                | A6                  | A7   | A8   | A9   | A10   | A11  | A12   | A13  | A14  | A15  | A16  |
| TTCA (Site 5)  |                     |      |      | 5.05 |       |      |       | 2.92 |      |      | 0.07 |
| TTCT (Site 8)  |                     |      | 8.50 | 3.07 | 2.77  |      | 11.17 |      |      |      |      |
| TTCG (Site 11) |                     |      |      | 6.43 |       |      |       | 0.97 | 0.10 |      | 0.13 |
| TTCC (Site 13) |                     | 1.12 |      |      | 15.01 | 2.32 | 1.10  |      | 0.11 |      |      |
| TCCA (Site 15) | 0.01                |      | 5.84 |      | 2.92  |      |       |      |      | 0.52 |      |
| TCCT (Site 16) |                     |      |      |      | 7.48  |      |       |      |      | 6.23 | 0.48 |

| PAM (target gene) | LbABE8e-G532R/K595R |      |    |      |     |      |     |     |     |      |     |
|-------------------|---------------------|------|----|------|-----|------|-----|-----|-----|------|-----|
|                   | A6                  | A7   | A8 | A9   | A10 | A11  | A12 | A13 | A14 | A15  | A16 |
| TTTA (APC)        |                     | 2.29 |    |      |     |      |     |     |     |      |     |
| TCTC (PIK3CA)     | 0                   |      | 0  |      |     | 12.7 | 0   |     |     | 0    |     |
| TTCA (TP53)       |                     |      |    | 0.33 |     |      |     | 0.1 |     | 2.59 | 0   |

**Table S7.** The crRNA target sequences in Figure 5 and Figure S2 are shown in black and PAM sequences in blue. Red colored adenine (A) in the sequences represents a missense mutation in *APC*, *PIK3CA*, and *TP53* gene which are corresponding to 6496C(G)/T(A), 1633G/A, and 722C(G)/T(A), respectively. The crRNA sequences used in the CRISPR array are marked in yellow.

| Gene          | PAM  | No.                         | Sequence (5' to 3')          |
|---------------|------|-----------------------------|------------------------------|
| <i>APC</i>    | TTTA | -                           | TTTAGAATTCATGGGCCTTTATTACTT  |
|               | TTTT | -                           | TTTTAGAATTCATGGGCCTTTATTACT  |
|               | TCCC | -                           | TCCCCTGGTTTTAGAAATTCATGGGCCT |
|               | CCCT | -                           | CCCTGGTTTTAGAAATTCATGGGCCTT  |
| <i>PIK3CA</i> |      | TS1                         | CTCTCTCTGAAATCACTAAGCAGGAGA  |
|               | CTCT | TS2                         | CTCTCTGAAATCACTAAGCAGGAGAAA  |
|               |      | TS3                         | CTCTGAAATCACTAAGCAGGAGAAAGA  |
|               | TCTC | TS1                         | TCTCTCTGAAATCACTAAGCAGGAGAA  |
|               |      | TS2                         | TCTCTGAAATCACTAAGCAGGAGAAAAG |
|               | TCTG | TS1                         | TCTGAAATCACTAAGCAGGAGAAAGAT  |
| TCCT          | TS1  | TCCTCTCTCTGAAATCACTAAGCAGGA |                              |
| <i>TP53</i>   | TTCA | -                           | TTCATGCCGCCCATGCAGAAACTGTTA  |

**Table S8.** The crRNA sequences in Figure 5 are presented. The crRNA sequence targeting *APC*, *PIK3CA*, and *TP53* gene containing a missense mutation (adenine; a) are highlighted with yellow, green, and blue color, respectively. As control, the non-targeting crRNA sequence that does not target human genome are highlighted with pink color, respectively. The direct repeat and separator sequences are marked with black and red, respectively.

| Multiplexed crRNA | Sequence (5' to 3')                                                                                                                              |
|-------------------|--------------------------------------------------------------------------------------------------------------------------------------------------|
| V1                | aatttctactaagtgtagatGAATTCaTGGGCCTTATTACTT<br>aatttctactaagtgtagatTGAAATCACTaAGCAGGAGAAAGaatttctactaagtgtagatTGCCGCCCATGCAGaAA<br>CTGTTA         |
| V2                | aatttctactaagtgtagatGAATTCaTGGGCCTTATTACTT<br>AAATaatttctactaagtgtagatTGAAATCACTaAGCAGGAGAAAGAAATaatttctactaagtgtagatTGCCGCCCA<br>TGCAGaAACTGTTA |
| V3                | AAATaatttctactaagtgtagatGAATTCaTGGGCCTTATTACTTAAATaatttctactaagtgtagatTGAAATCAG<br>TaAGCAGGAGAAAGAAATaatttctactaagtgtagatTGCCGCCCATGCAGaAACTGTTA |
| Non-targeting     | AAATaatttctactaagtgtagatCACCTGTTCAATCCCTGCAGGAATaatttctactaagtgtagatTGAGGAGCC<br>GGAGCCCCAAGCAAAATaatttctactaagtgtagatATTCCCTGCAGGACAACGCCCA     |

**Table S9.** List of primers used for targeted deep sequencing.

| Gene.         | 1st PCR                    |                               | 2nd PCR                                                             |                                                                        |
|---------------|----------------------------|-------------------------------|---------------------------------------------------------------------|------------------------------------------------------------------------|
|               | Forward (5' to 3')         | Reverse (5' to 3')            | Forward (5' to 3')                                                  | Reverse (5' to 3')                                                     |
| <b>APC</b>    |                            |                               |                                                                     |                                                                        |
| exon 8        | GATAGTCGACCGCCAATC<br>GT   | ACAGCACATTGGTAC<br>TGAATGC    | ACACTCTTCCCTACACGACG<br>CTCTCCGATCTAGCCTACAC<br>CATTTTTGCATGT       | GTGACTGGAGTTCAGACG<br>TGTGCTCTCCGATCTAC<br>CATCTTGCTTCATACTTT<br>TCTGA |
| exon 11       | TTTTTTTTTTGGCGGGGG<br>GG   | CTGGTCCATGCCTGG<br>TTCAT      | ACACTCTTCCCTACACGACG<br>CTCTCCGATCTCCATGCGAC<br>AGTCTGGATGT         | GTGACTGGAGTTCAGACG<br>TGTGCTCTCCGATCTGA<br>TTTCACGCTGCCTCTCT           |
| <b>CTNNB1</b> |                            |                               |                                                                     |                                                                        |
| exon 1        | CTCTCCACCCTATCCCTA<br>GTTT | TGTGTGGGCTGACCT<br>AGTAA      | ACACTCTTCCCTACACGACG<br>CTCTCCGATCTGAGGAGAGA<br>CAGCCCTTAGT         | GTGACTGGAGTTCAGACG<br>TGTGCTCTCCGATCTCT<br>ATGAGGTGAAGGAGGTA<br>AA     |
| exon 3        | GCTTTCCTCTCTCCCTGC<br>TT   | CTGACTTTCAGTAAG<br>GCAATGAA   | ACACTCTTCCCTACACGACG<br>CTCTCCGATCTCCAATCTAC<br>TAATGCTAATACTGTTTCG | GTGACTGGAGTTCAGACG<br>TGTGCTCTCCGATCTAC<br>TCTTACCAGCTACTTGT<br>CT     |
| exon 4        | CAAGAACAAGTAGCTGGT<br>AAGA | CATGATAGCGTGTCT<br>GGAAG      | ACACTCTTCCCTACACGACG<br>CTCTCCGATCTGAACGTGG<br>ATAGTGAGTGTTG        | GTGACTGGAGTTCAGACG<br>TGTGCTCTCCGATCTTA<br>CCTGGTCTCGTCATTTA<br>G      |
| exon 9        | CTTACCTGACAGATCCA<br>AGTC  | CGCAGCCATACTTCC<br>TACTTAC    | ACACTCTTCCCTACACGACG<br>CTCTCCGATCTATAGGAAGG<br>GATGGAAGGTCTC       | GTGACTGGAGTTCAGACG<br>TGTGCTCTCCGATCTCA<br>GATGACGAAGCACAGA<br>TG      |
| <b>PIK3CA</b> |                            |                               |                                                                     |                                                                        |
| exon 2        | TGCCCCAAGAATCCTAG<br>TAGA  | GCAAAGGCAGCAAAC<br>ATTCC      | ACACTCTTCCCTACACGACG<br>CTCTCCGATCTAGCAAGAAA<br>ATACCCCTCCA         | GTGACTGGAGTTCAGACG<br>TGTGCTCTCCGATCTTC<br>ACGGTTGCTACTGGTTC           |
| exon 4        | GGCAGCCCGCTCAGATAT<br>AA   | CTGGGCGAGAGTGAG<br>ATTCC      | ACACTCTTCCCTACACGACG<br>CTCTCCGATCTGGCAAATAA<br>TAGTGGTGATCTGGG     | GTGACTGGAGTTCAGACG<br>TGTGCTCTCCGATCTAG<br>GAAGTATTCATCACATCC<br>ACACA |
| <b>SRSF3</b>  |                            |                               |                                                                     |                                                                        |
| exon 2        | GGCTTCCTGAGGGTTAGG<br>AG   | CAGTGATTGGGAAAG<br>CCATC      | ACACTCTTCCCTACACGACG<br>CTCTCCGATCTAGAAATGCA<br>TCGTGATTCTCG        | GTGACTGGAGTTCAGACG<br>TGTGCTCTCCGATCTGC<br>CATCTAAGAGCCACATAT<br>CC    |
| exon 3        | GCCTCATAAAGTGTGGG<br>ATTAC | CCAACATGAACAGTG<br>ACCTAAAG   | ACACTCTTCCCTACACGACG<br>CTCTCCGATCTGCCTCATAA<br>AGTGTGGGATTAC       | GTGACTGGAGTTCAGACG<br>TGTGCTCTCCGATCTGG<br>GCCACGATTTCTACTTCT          |
| exon 5        | GGAGTGCAGTGGTGTGAT<br>TA   | CATCTGTAACCTGGT<br>GACACTTTAG | ACACTCTTCCCTACACGACG<br>CTCTCCGATCTGAGTACCA<br>TGCCAGATCAA          | GTGACTGGAGTTCAGACG<br>TGTGCTCTCCGATCTGG<br>CTTAGAAGACAGGCTTA<br>G      |
| <b>TP53</b>   |                            |                               |                                                                     |                                                                        |
| exon 4        | GCACCACCACACTATGTC<br>GA   | CGCCAACTCTCTCTA<br>GCTCG      | ACACTCTTCCCTACACGACG<br>CTCTCCGATCTGTGAGGAAT<br>CAGAGGCCTGG         | GTGACTGGAGTTCAGACG<br>TGTGCTCTCCGATCTCC<br>CTGCCCAACAAGATGT            |
| exon 5        | TAAGCAGCAGGAGAAAGC<br>CC   | CTACAGTACTCCCT<br>GCCCT       | ACACTCTTCCCTACACGACG<br>CTCTCCGATCTTAAGCAGCA<br>GGAGAAAGCCC         | GTGACTGGAGTTCAGACG<br>TGTGCTCTCCGATCTCC<br>AGGCCTCTGATTCCTCAC          |
